# Supplementary material for: Hydrogen spillover effects in the Fischer–Tropsch reaction over carbon nanotube supported cobalt catalysts
Source: Royal Society of Chemistry journal article supplement (doi:10.1039/d3cy00014a), 2023-01-01
Supplement: d3cy00014a1.pdf [file d3cy00014a1.pdf]

## Supporting Information

### Hydrogen spillover effects in the Fischer-Tropsch reaction over carbon nanotube supported cobalt catalysts

*Heng Zhang, † Anliang Dong, † Bing Liu, Jie Chen, Yuebing Xu, Xiaohao Liu\**

Department of Chemical Engineering, School of Chemical and Material Engineering, Jiangnan  
University, 214122 Wuxi, China

†These authors contributed equally to this work

\*Corresponding author: [liuxh@jiangnan.edu.cn](mailto:liuxh@jiangnan.edu.cn)

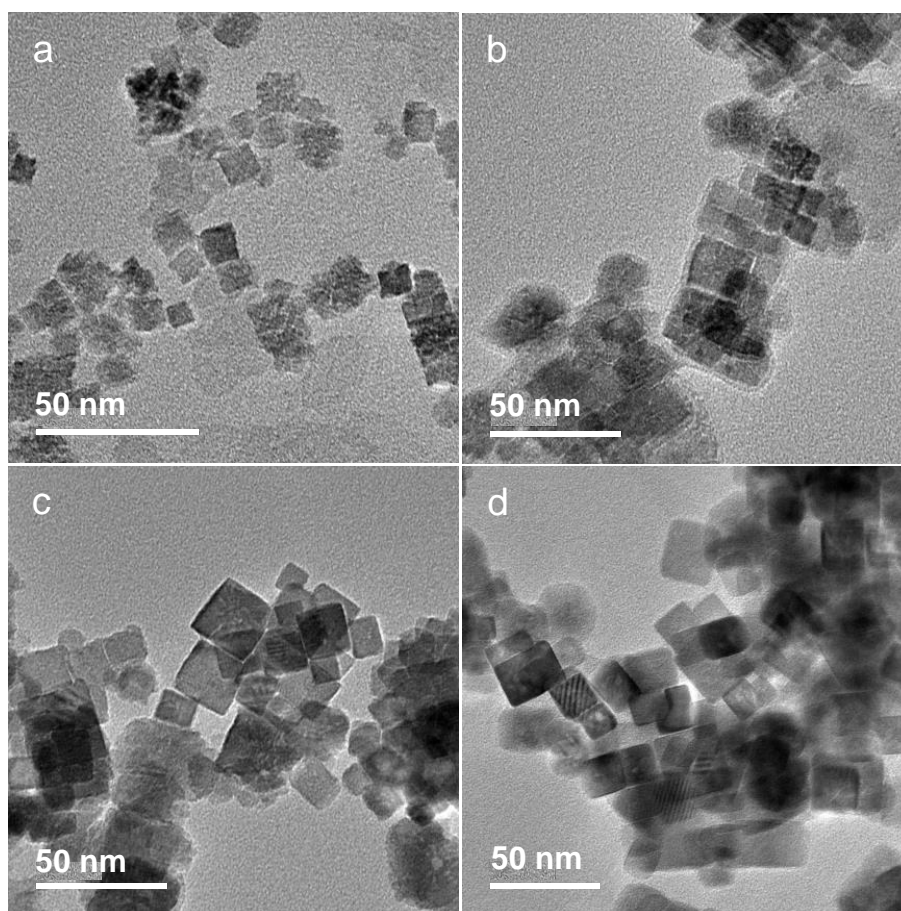

**Fig. S1** TEM images of the (a) Co-100, (b) Co-125, (c) Co-175, and (d) Co-200 catalysts.

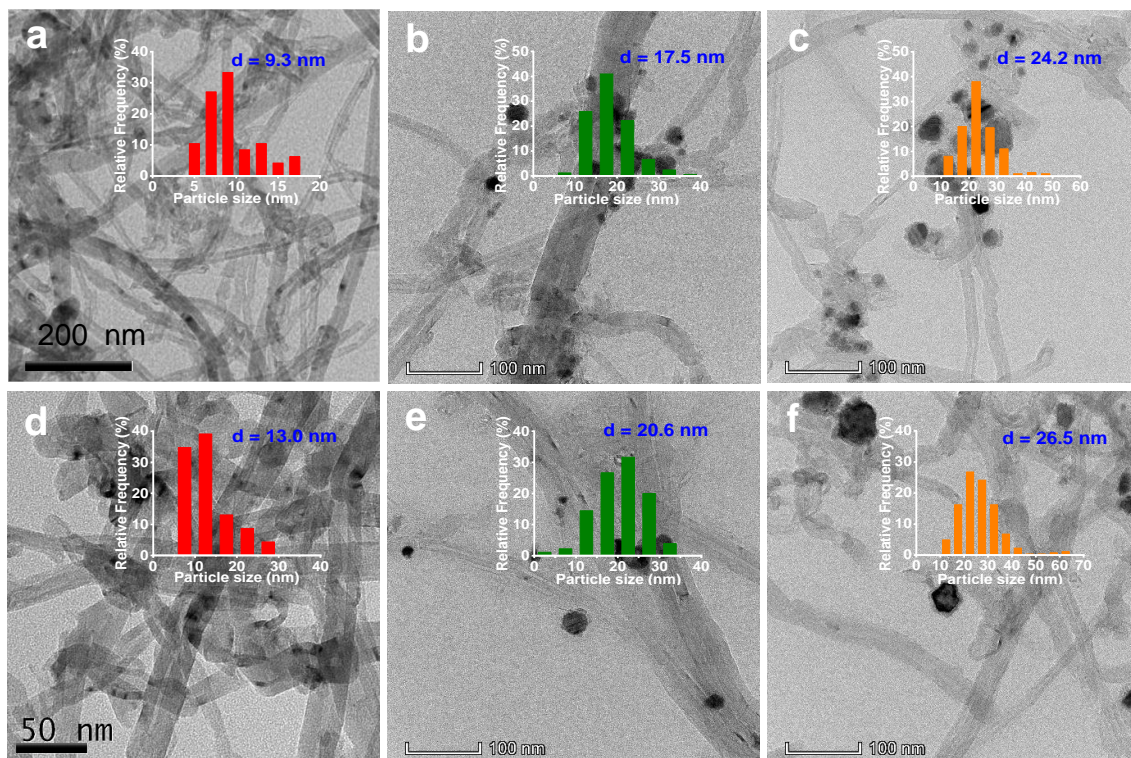

**Fig. S2** TEM images and particle size of the fresh (a, d), reduced (b, e), and spent (c, f) 12Co/CNTs-IWI and 19Co/CNTs-IWI, respectively.

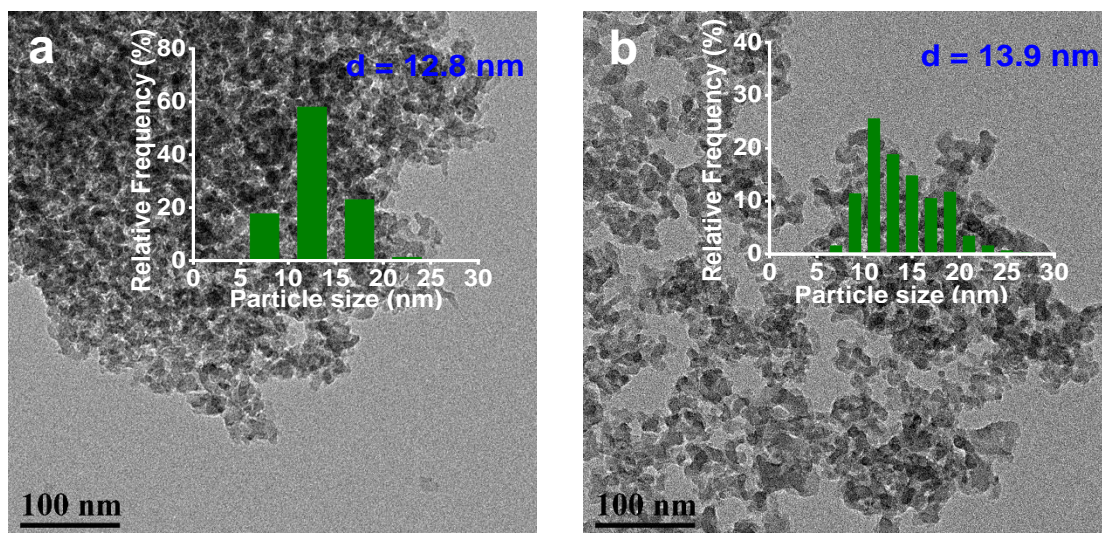

**Fig. S3** TEM images and particle size of the reduced catalysts: (a) 12Co/SiO<sub>2</sub>-IWI, and (b) 19Co/SiO<sub>2</sub>-IWI, respectively.

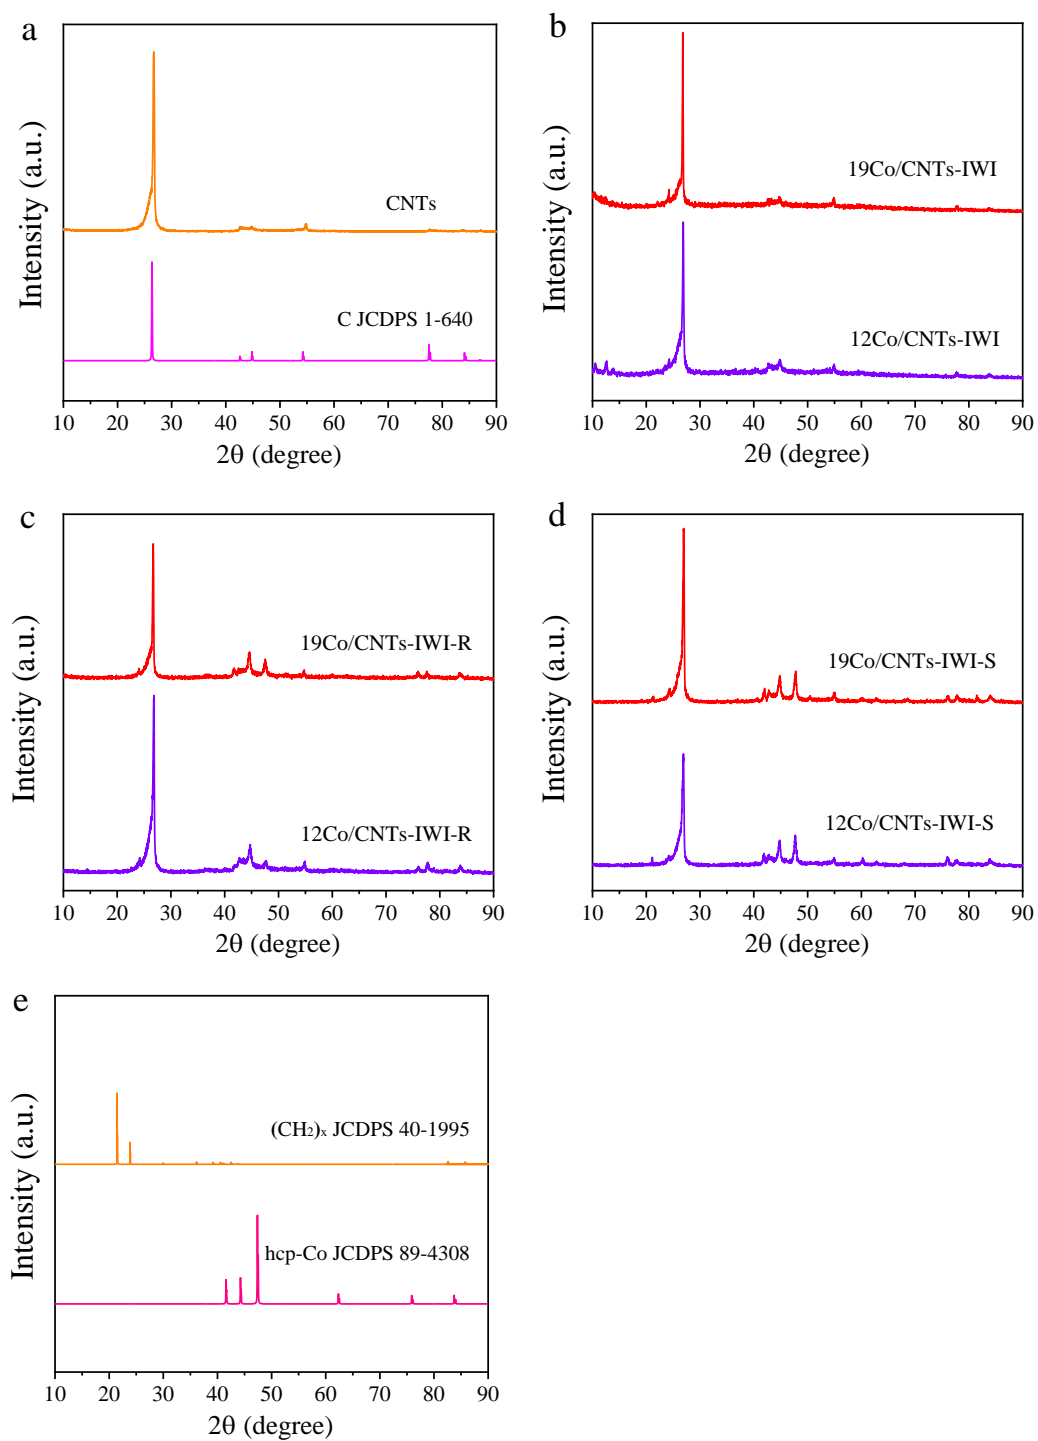

**Fig. S4** XRD patterns of the CNTs support (a), fresh (b), reduced (c), spent (d) Co/CNTs-IWI catalysts, and standard references (e).

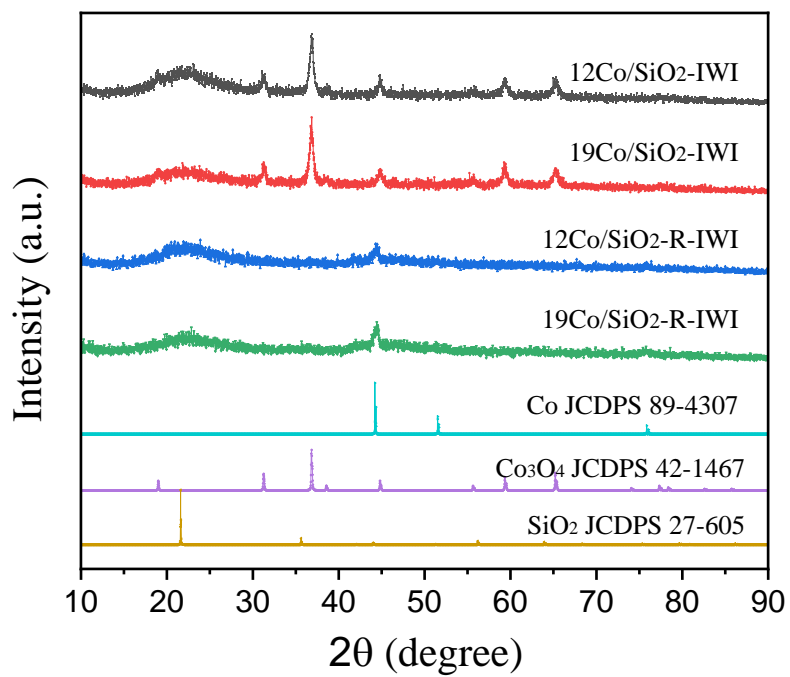

**Fig. S5** XRD patterns of the fresh and reduced 12Co/SiO<sub>2</sub> and 19Co/SiO<sub>2</sub> catalysts.

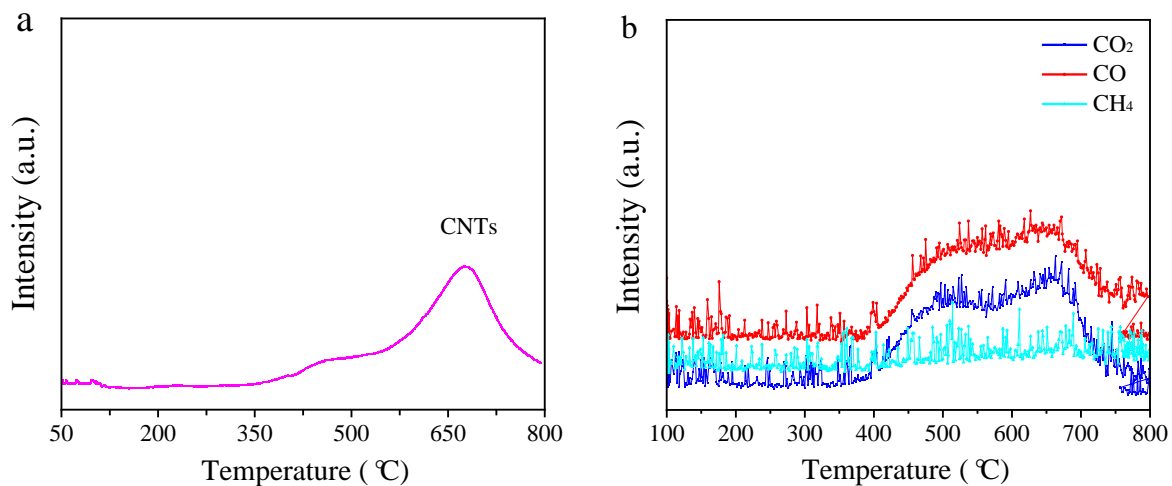

**Fig. S6** H<sub>2</sub>-TPR-MS profiles of the CNTs support: (a) H<sub>2</sub>-TPR; (b) MS. Note that: The intensity of vertical axis in a is 1/32 of that in Figure S7. And that in b is ranged from  $1 \times 10^{-13}$  to  $2 \times 10^{-12}$ .

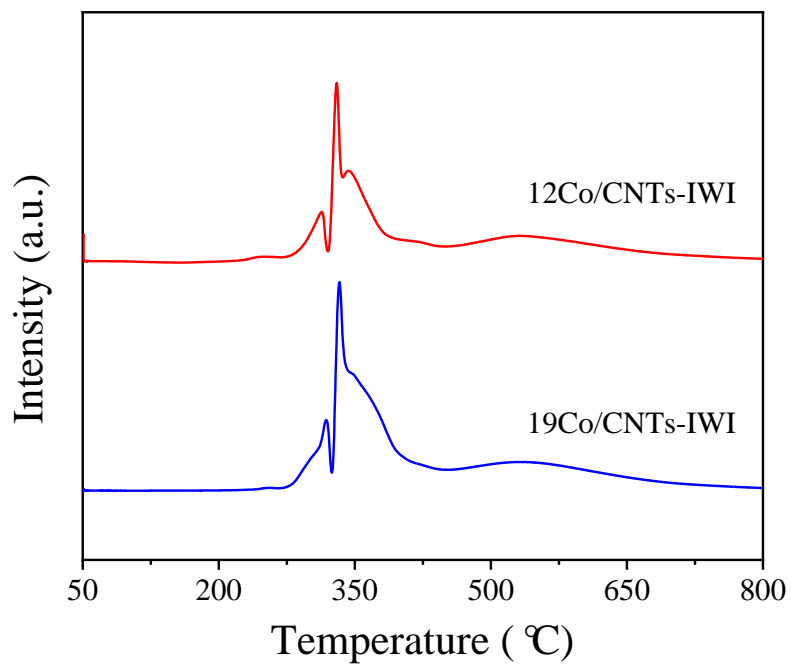

**Fig. S7** H<sub>2</sub>-TPR profiles of the fresh Co/CNTs-IWI catalysts.



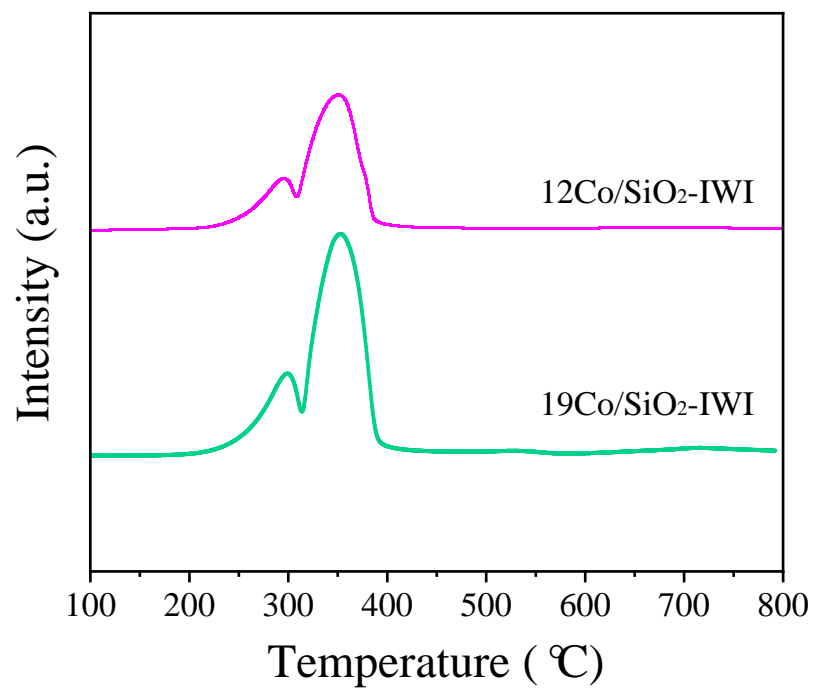

**Fig. S8** H<sub>2</sub>-TPR profiles of the fresh Co/SiO<sub>2</sub>-IWI catalysts.

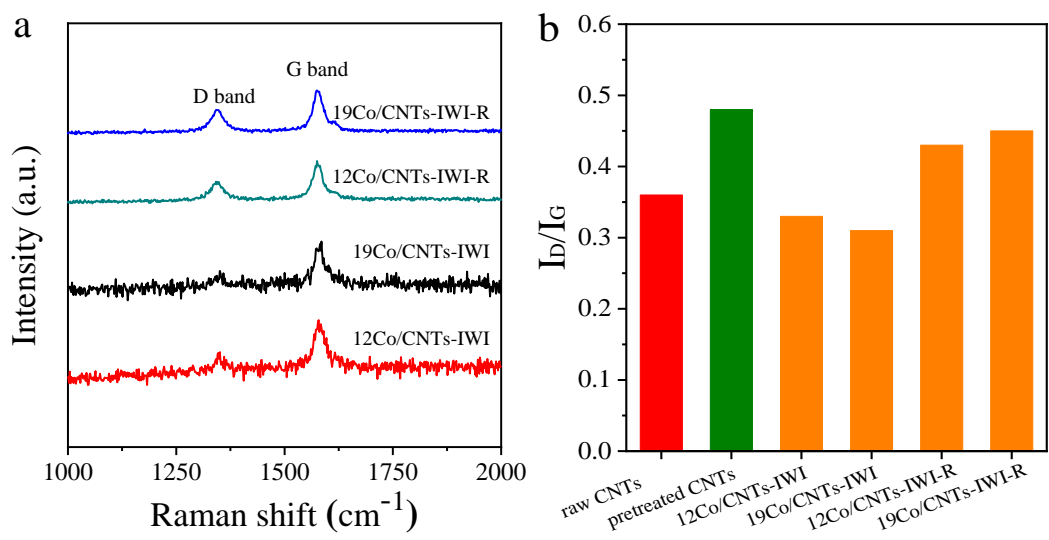

**Fig. S9** Raman spectra of the fresh and reduced Co/CNTs-IWI catalysts (a), and the corresponding calculated  $I_D/I_G$  values (b).

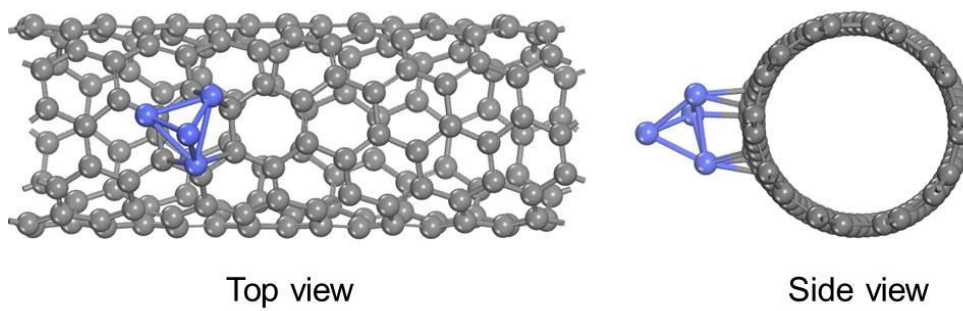

**Fig. S10** Structural model for  $\text{Co}_4$  cluster absorbed on outside surface of CNT.

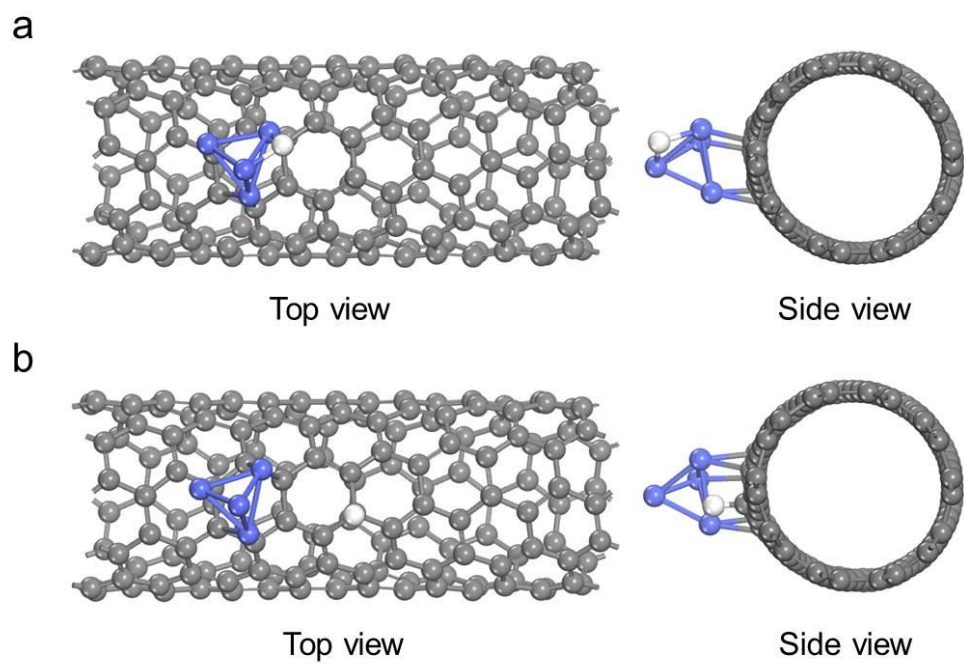

**Fig. S11** Structural models for hydrogen spillover from (a)  $\text{Co}_4$  cluster to (b) pristine CNT.

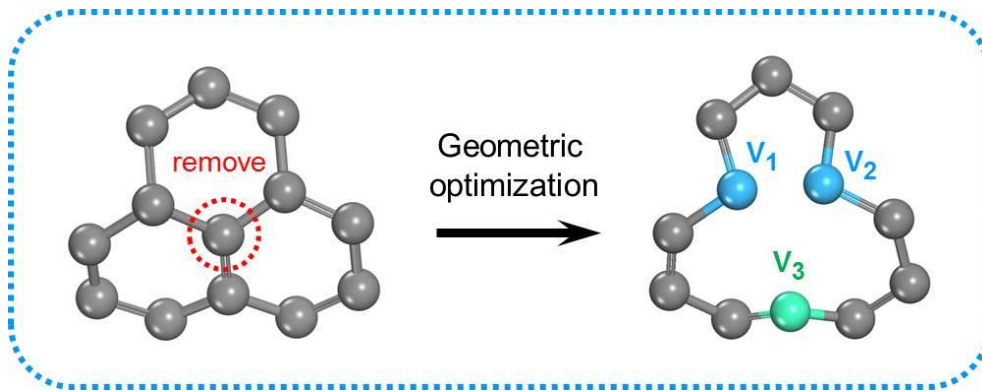

**Fig. S12** The illustration of defect carbon sites in CNT.

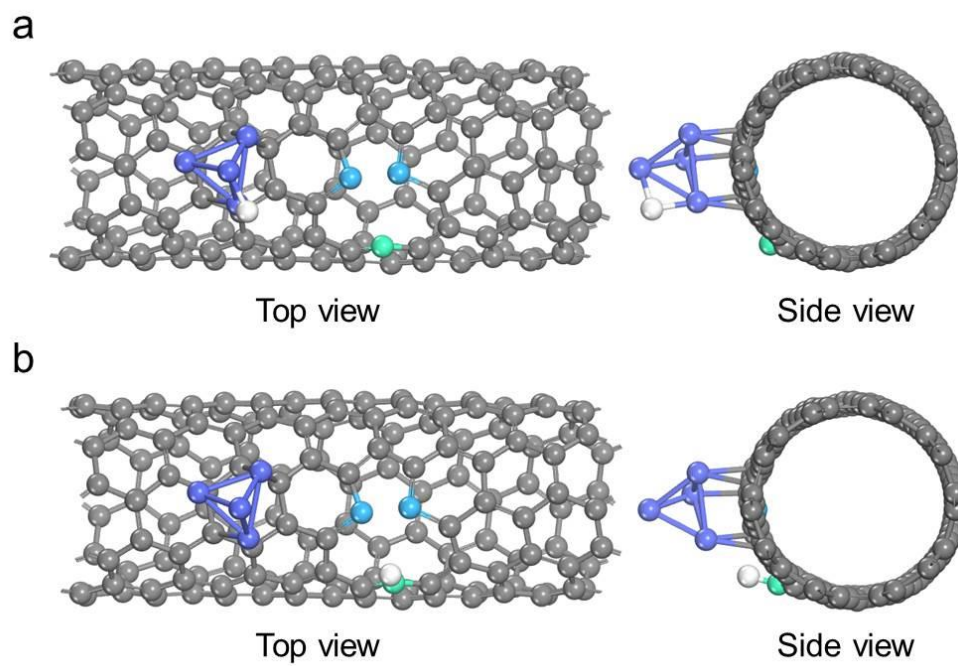

**Fig. S13** Structural models for hydrogen spillover from (a) Co<sub>4</sub> cluster to (b) V<sub>3</sub> defect site.

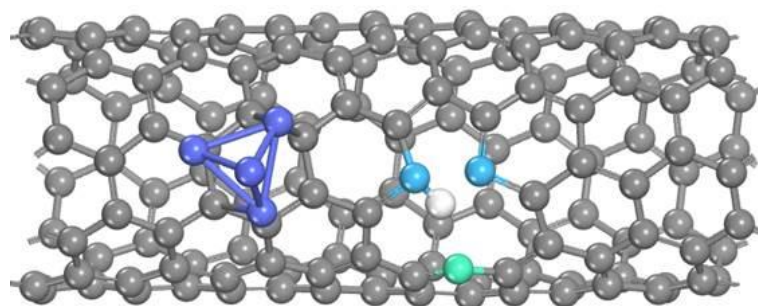

POSCAR1

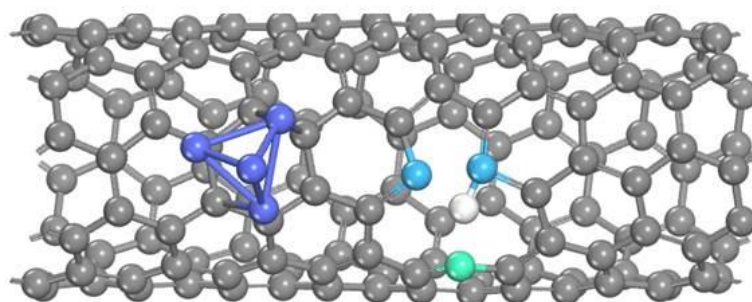

POSCAR2

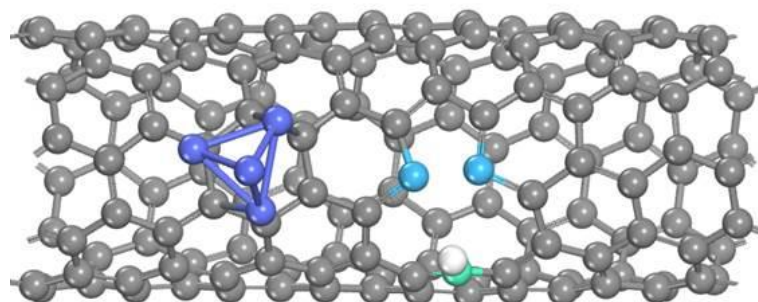

CONTCAR

**Fig. S14** Geometric optimization for hydrogen absorbed on  $V_1$  and  $V_2$  defect sites.

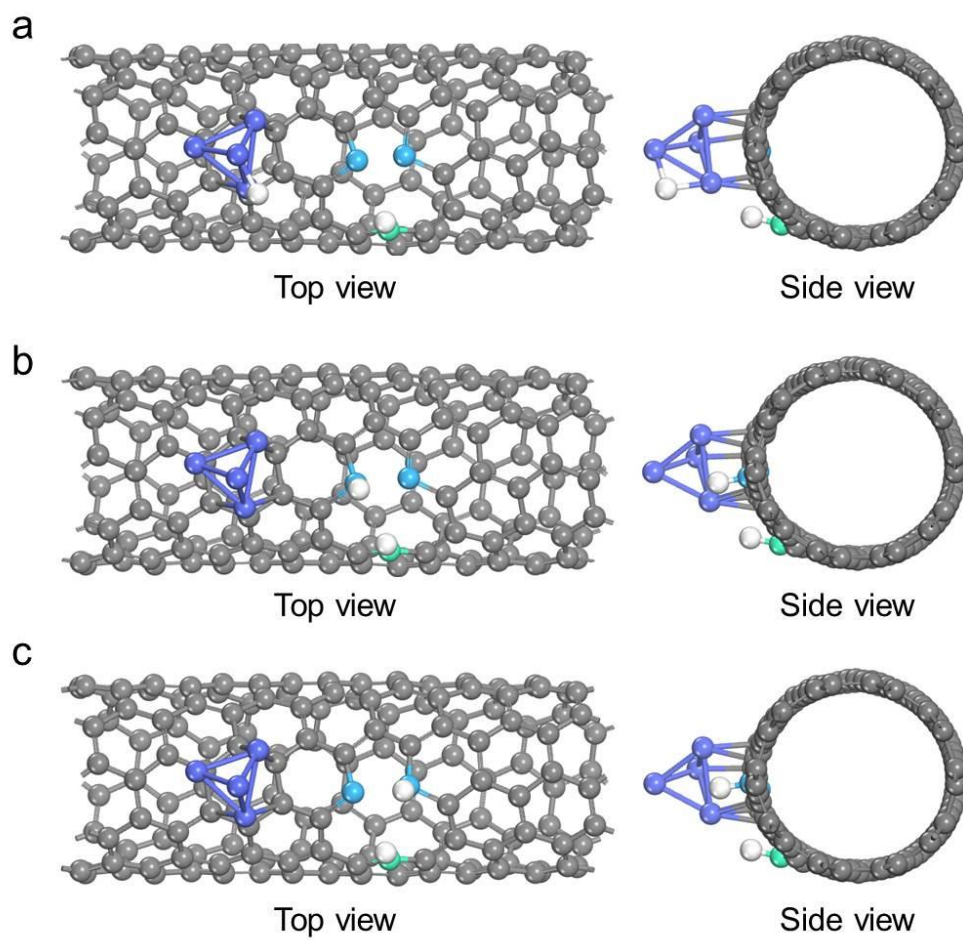

**Fig. S15** Structural models for hydrogen spillover from (a) Co<sub>4</sub> cluster to (b) V<sub>1</sub> and (c) V<sub>2</sub> defect sites.



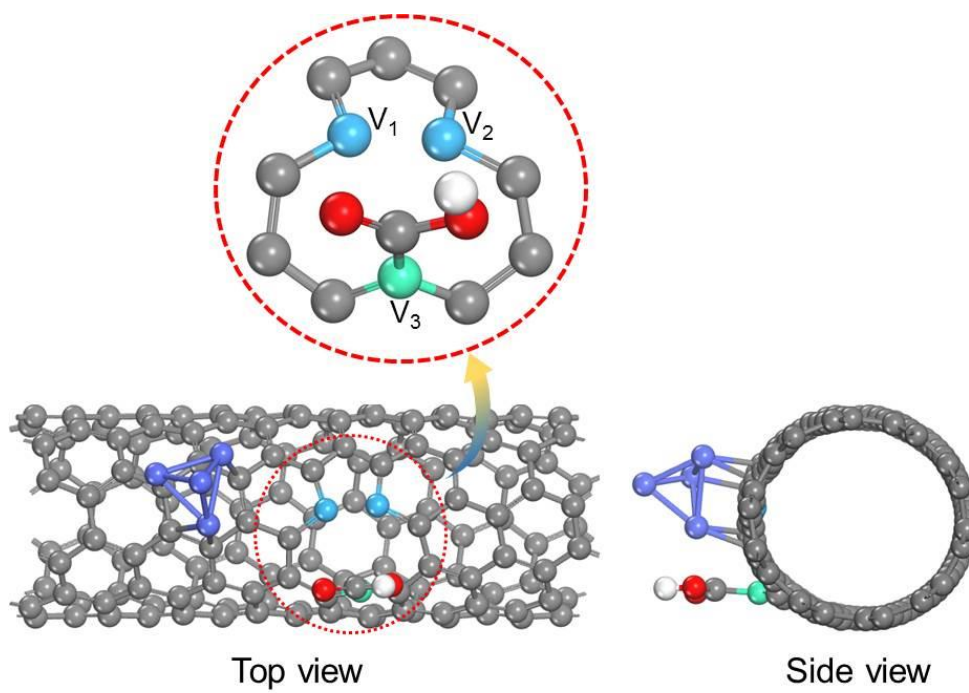

**Fig. S16** Structural model for  $\text{Co}_4$  cluster adsorbed on outside surface of CNT with  $\text{COOH}$  group.

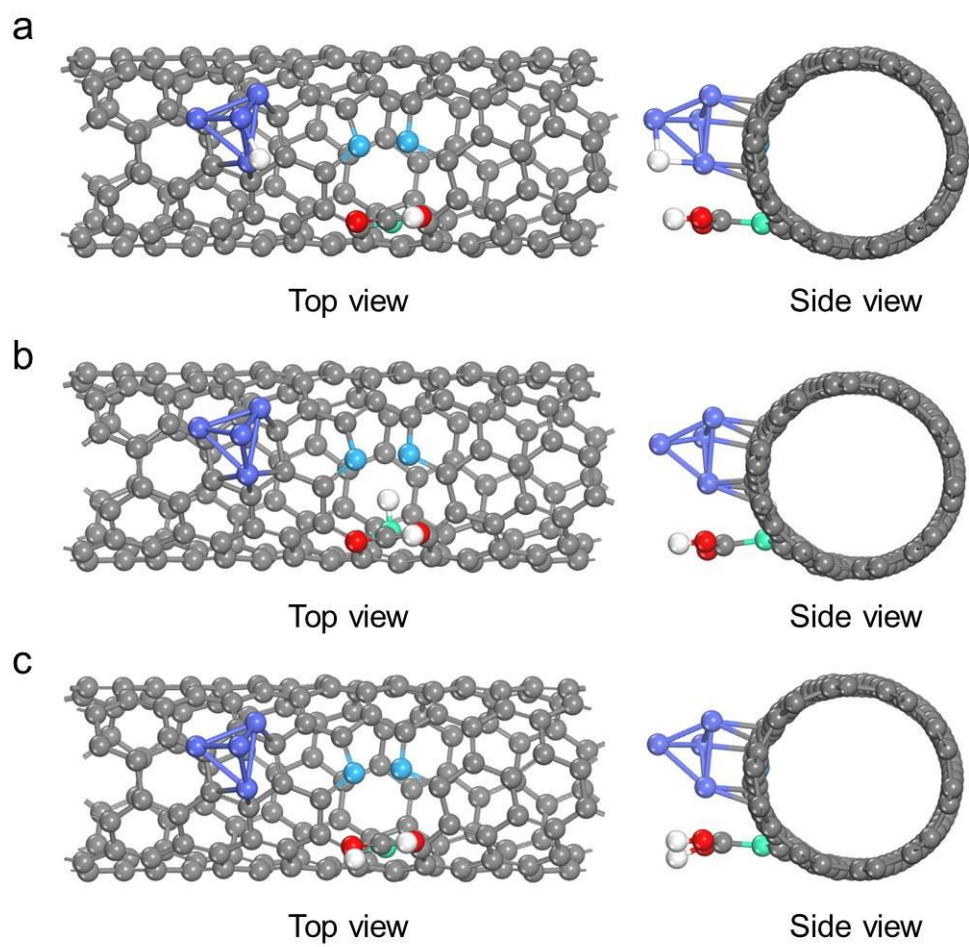

**Fig. S17** Structural models for hydrogen spillover from (a) Co<sub>4</sub> cluster to (b) V<sub>3</sub> defect site and (c) O site.

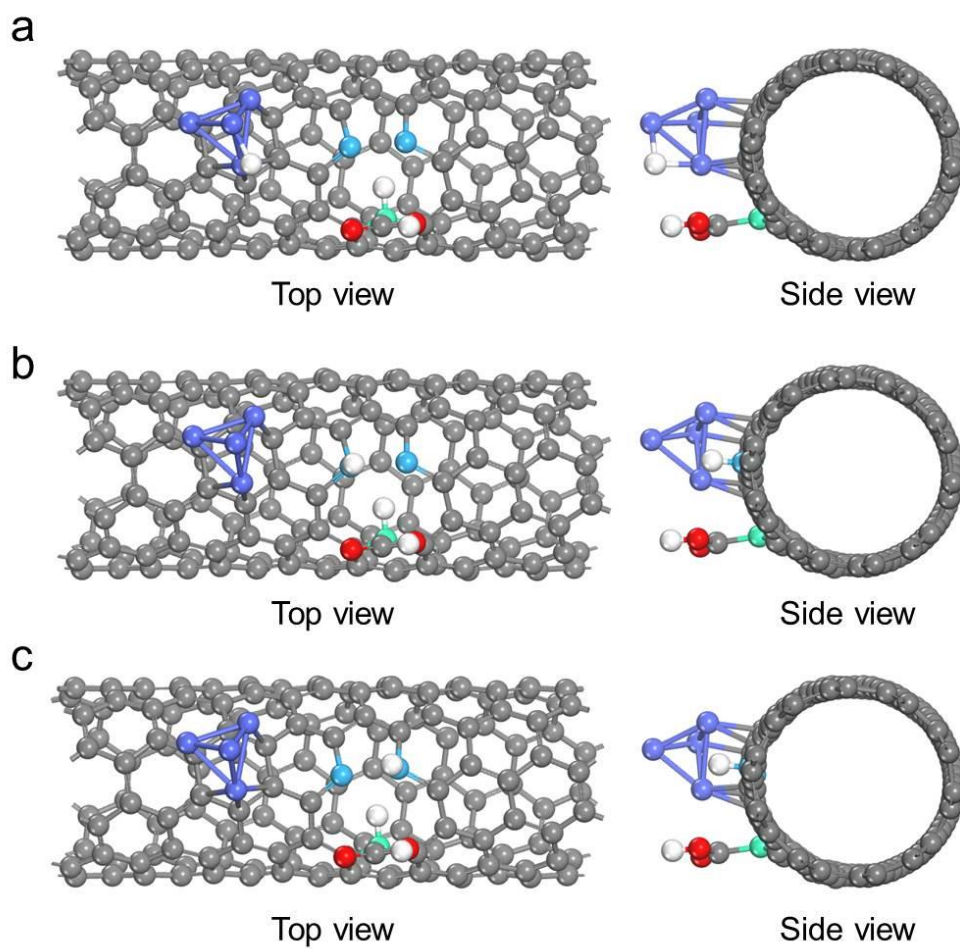

**Fig. S18** Structural models for hydrogen spillover from (a) Co<sub>4</sub> cluster to (b) V<sub>1</sub> and (c) V<sub>2</sub> defect sites.

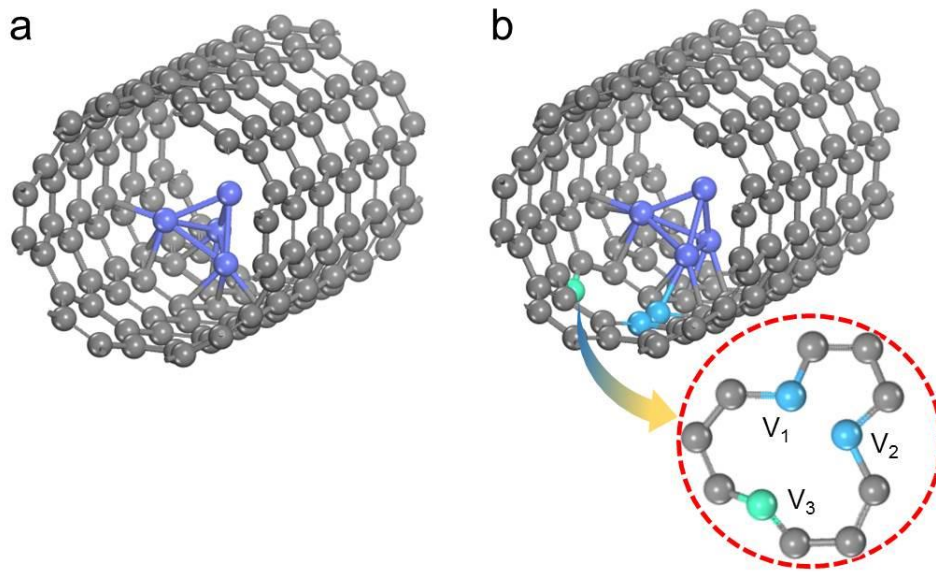

**Fig. S19** Structural models for  $\text{Co}_4$  cluster loaded inside (a) pristine CNT and (b) defect CNT.

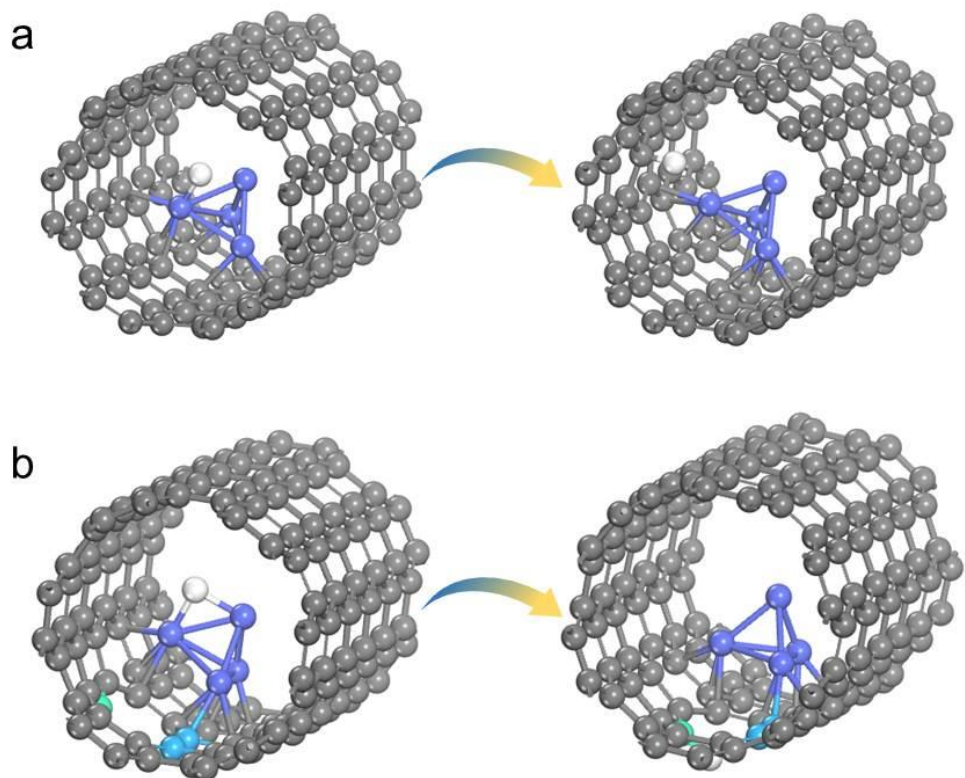

**Fig. S20** Structural models for hydrogen spillover from  $\text{Co}_4$  cluster to (a) pristine CNT and (b)  $\text{V}_3$  defect site.

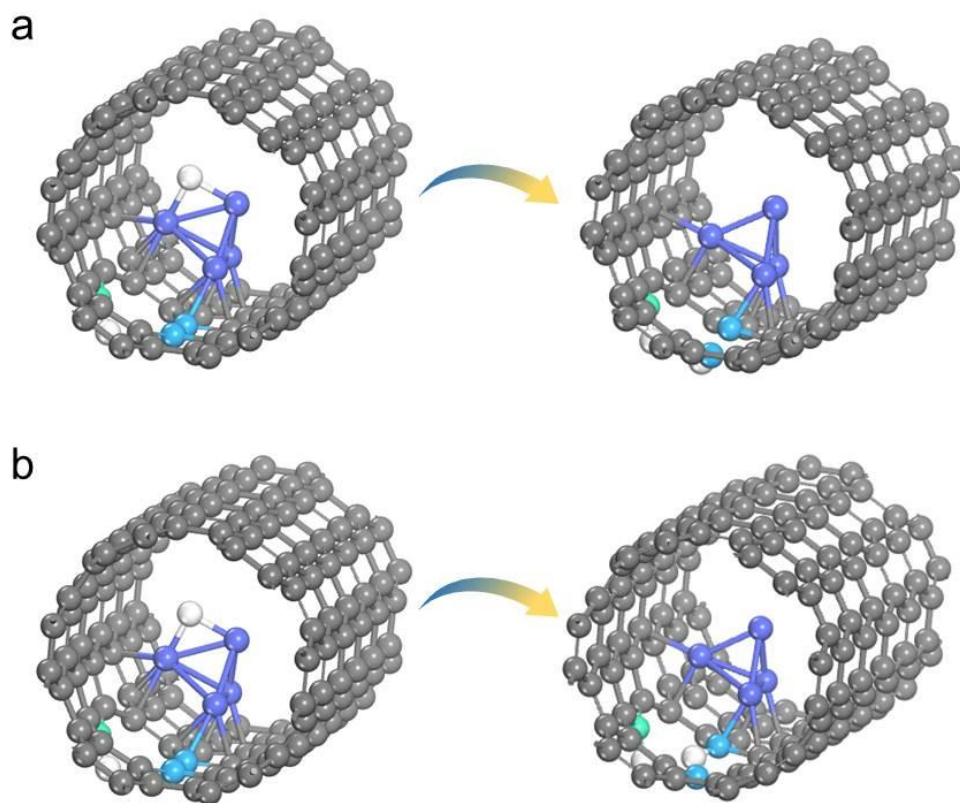

**Fig. S21** Structural models for hydrogen spillover from  $\text{Co}_4$  cluster to (a)  $\text{V}_1$  and (b)  $\text{V}_2$  defect sites.

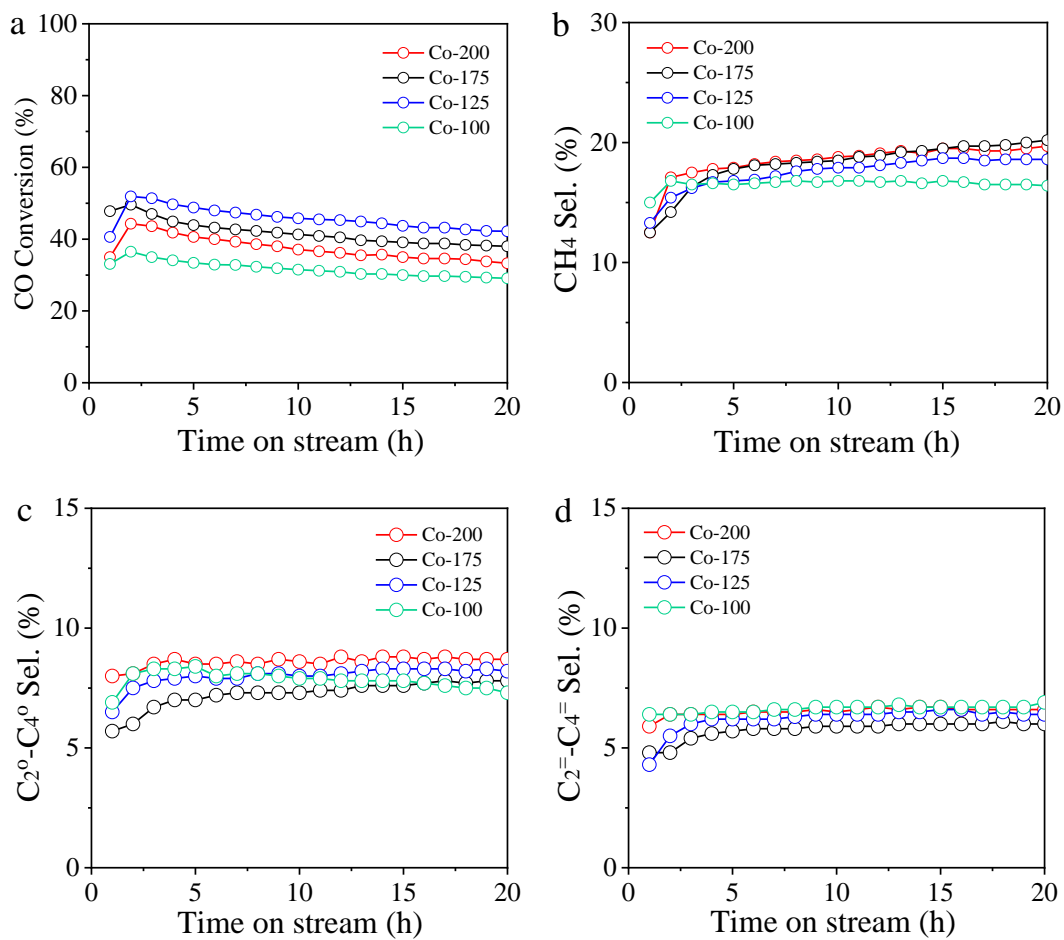

**Fig. S22** Catalytic performance of the FTS reaction over unsupported cobalt catalysts: (a) CO conversion; (b) CH<sub>4</sub> selectivity; (c) Selectivity to C<sub>2</sub>-C<sub>4</sub> paraffins; (d) Selectivity to C<sub>2</sub>-C<sub>4</sub> olefins. Reaction conditions: 0.5 g of catalyst, T = 240 °C, P = 1 MPa, the molar ratio of H<sub>2</sub>/CO/N<sub>2</sub> = 63.3/31.7/5, and GHSV = 4.5 L g<sub>cat</sub><sup>-1</sup>h<sup>-1</sup>.

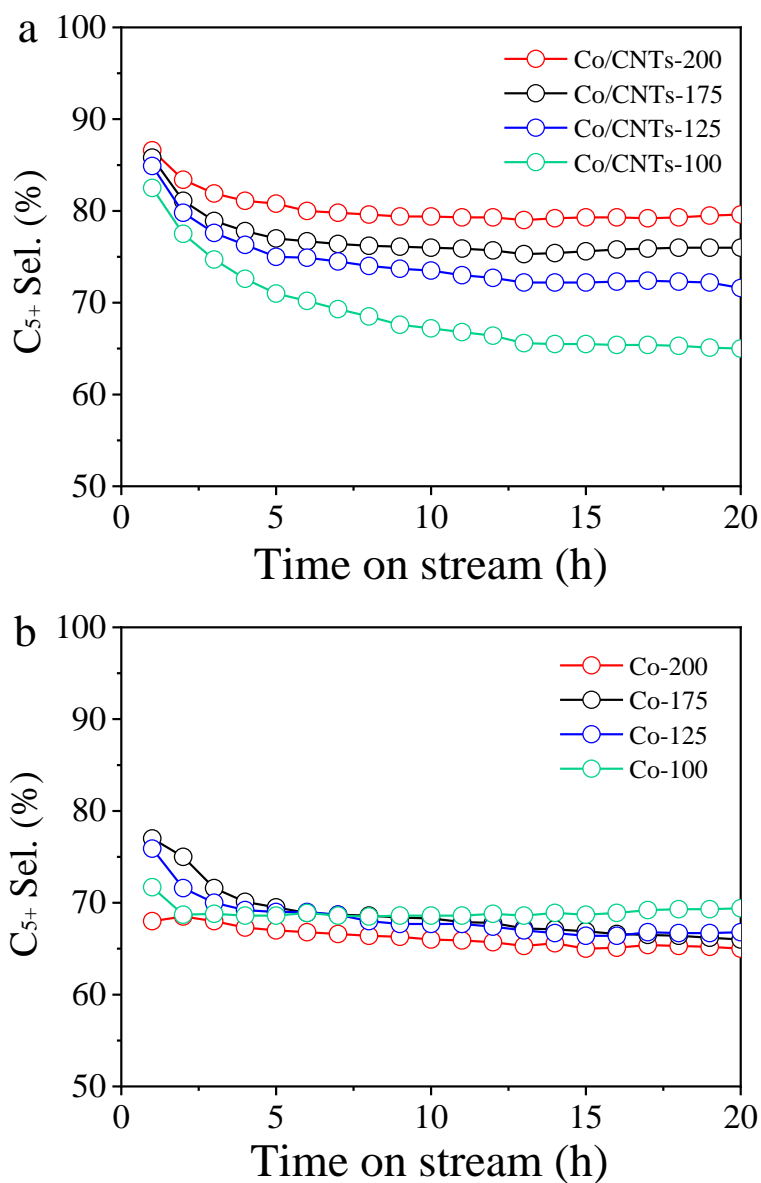

**Fig. S23** Selectivity to C<sub>5+</sub> in the FTS reaction over unsupported and CNT supported cobalt catalysts. Reaction conditions: T = 240 °C, P = 1 MPa, and the molar ratio of H<sub>2</sub>/CO/N<sub>2</sub> = 63.3/31.7/5; (a) 1g of catalyst, GHSV=2.22 L g<sub>cat</sub><sup>-1</sup>h<sup>-1</sup>; (b) 0.5 g of catalyst, GHSV=4.5 L g<sub>cat</sub><sup>-1</sup>h<sup>-1</sup>.



**Table S1** Textural properties of catalysts.

| Catalysts     | Surface areas<br>(m <sup>2</sup> g <sup>-1</sup> ) | Pore volume<br>(cm <sup>3</sup> g <sup>-1</sup> ) | Pore size<br>(nm) | Particle size<br>(nm) <sup>a</sup> | Metallic Co<br>(wt%) <sup>b</sup> |
|---------------|----------------------------------------------------|---------------------------------------------------|-------------------|------------------------------------|-----------------------------------|
| Co-100        | 141.6                                              | 0.17                                              | 3.8               | 8.4                                | 57.3                              |
| Co-125        | 116.9                                              | 0.24                                              | 3.8               | 10.2                               | 64.5                              |
| Co-175        | 49.6                                               | 0.33                                              | 30.8              | 16.9                               | 69.1                              |
| Co-200        | 44.1                                               | 0.34                                              | 31.1              | 18.4                               | 70.2                              |
| Co-100-R      | 8.6                                                | 0.04                                              | 3.4               | ---                                | ---                               |
| Co-125-R      | 7.4                                                | 0.02                                              | 3.1               | ---                                | ---                               |
| Co-175-R      | 6.5                                                | 0.03                                              | 3.8               | ---                                | ---                               |
| Co-200-R      | 5.2                                                | 0.02                                              | 3.1               | ---                                | ---                               |
| Co/CNTs-100-S | 45.5                                               | 0.66                                              | 3.9               | 20                                 | ---                               |
| Co/CNTs-125-S | 23.5                                               | 0.40                                              | 3.7               | 31                                 | ---                               |
| Co/CNTs-175-S | 13.4                                               | 0.19                                              | 3.8               | 46                                 | ---                               |
| Co/CNTs-200-S | 6.1                                                | 0.19                                              | 3.1               | 48                                 | ---                               |

<sup>a</sup>From TEM images. <sup>b</sup>From ICP-OES.

**Table S2** Catalytic performance of unsupported cobalt catalysts in the FTS reactions.

| Catalysts | X <sub>CO</sub><br>(%) | S <sub>CO2</sub><br>(%) | Hydrocarbon selectivity (%) |                                                          |                                                          |                 | O/O+P<br>(%) | TOF<br>(10 <sup>-2</sup> s <sup>-1</sup> ) |
|-----------|------------------------|-------------------------|-----------------------------|----------------------------------------------------------|----------------------------------------------------------|-----------------|--------------|--------------------------------------------|
|           |                        |                         | CH <sub>4</sub>             | C <sub>2</sub> <sup>=</sup> -C <sub>4</sub> <sup>=</sup> | C <sub>2</sub> <sup>o</sup> -C <sub>4</sub> <sup>o</sup> | C <sub>5+</sub> |              |                                            |
| Co-200    | 34.2                   | 0.7                     | 19.4                        | 6.6                                                      | 8.8                                                      | 65.1            | 65.1         | ---                                        |
| Co-175    | 38.4                   | 0.6                     | 19.9                        | 6.0                                                      | 7.7                                                      | 66.3            | 66.3         | ---                                        |
| Co-125    | 42.7                   | 0.7                     | 18.6                        | 6.5                                                      | 8.2                                                      | 66.7            | 66.3         | ---                                        |
| Co-100    | 29.5                   | 0.6                     | 16.5                        | 6.7                                                      | 7.5                                                      | 69.2            | 69.2         | ---                                        |

Reaction conditions: 0.5 g of catalyst, 240 °C, 1 MPa, H<sub>2</sub>/CO/N<sub>2</sub> = 63.3/31.7/5 (molar ratio), GHSV = 4.5 L g<sub>cat</sub><sup>-1</sup>h<sup>-1</sup>. The values for catalytic activity and selectivity were obtained by averaging the tested results in last 5 h.

**Table S3** Summary of the elementary reaction steps on [10 $\bar{1}$ 0], [0002] and [10 $\bar{1}$ 1] crystal planes for CO dissociation, methane formation, and carbon-carbon coupling.

| Reactions                                                               | 10 $\bar{1}$ 0(ΔE /eV) | 0002(ΔE /eV)                  | 10 $\bar{1}$ 1(ΔE /eV) |
|-------------------------------------------------------------------------|------------------------|-------------------------------|------------------------|
| CO → CO*                                                                | -1.80 (3f)             | -1.62(1f)/-1.60(2f)/-1.64(3f) | -1.86(3f)/-1.92(4f)    |
| CO* → C* + O*                                                           | 0.88                   | 0.97                          | -0.55                  |
| CHO* → CH* + O*                                                         | -0.64                  | -0.44                         | -1.41                  |
| CH <sub>2</sub> O* → CH <sub>2</sub> * + O*                             | -0.50                  | -0.61                         | -0.90                  |
| CH <sub>3</sub> O* → CH <sub>3</sub> * + O*                             | -0.34                  | -0.24                         | -0.38                  |
| CH <sub>2</sub> * + H → CH <sub>3</sub> *                               | -0.55                  | -0.23                         | 0.30                   |
| CH <sub>3</sub> * + H → CH <sub>4</sub> *                               | 0.08                   | 0.07                          | 0.00                   |
| CH <sub>2</sub> * + CH <sub>2</sub> * → C <sub>2</sub> H <sub>4</sub> * | -0.88                  | -0.55                         | -0.38                  |
